# Supplementary material for: Crystallization mechanism and catalytic performance of TS-1 synthesized by an aerosol-assisted method
Source: Royal Society of Chemistry journal article supplement (doi:10.1039/c7ce00364a), 2017-01-01
Supplement: c7ce00364a1.pdf [file c7ce00364a1.pdf]

## Supporting information

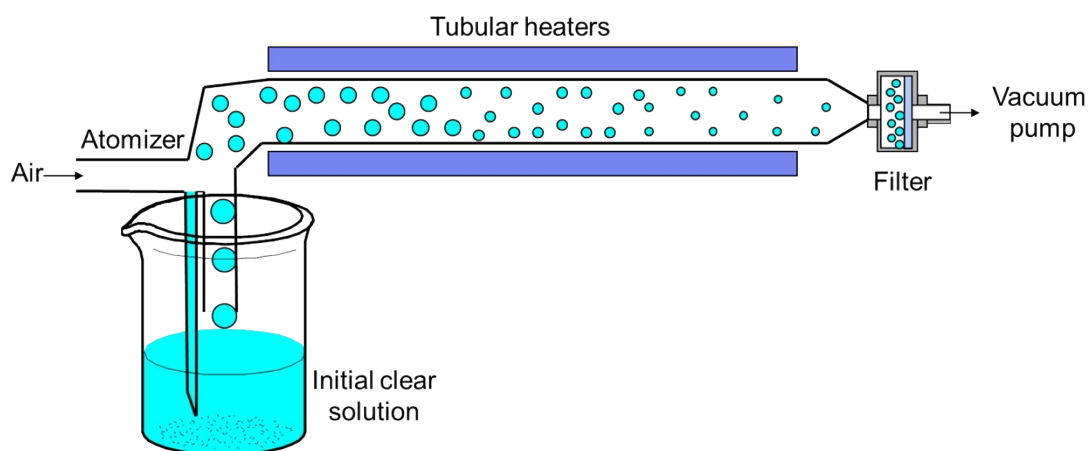

**Figure S1** Aerosol-dry apparatus

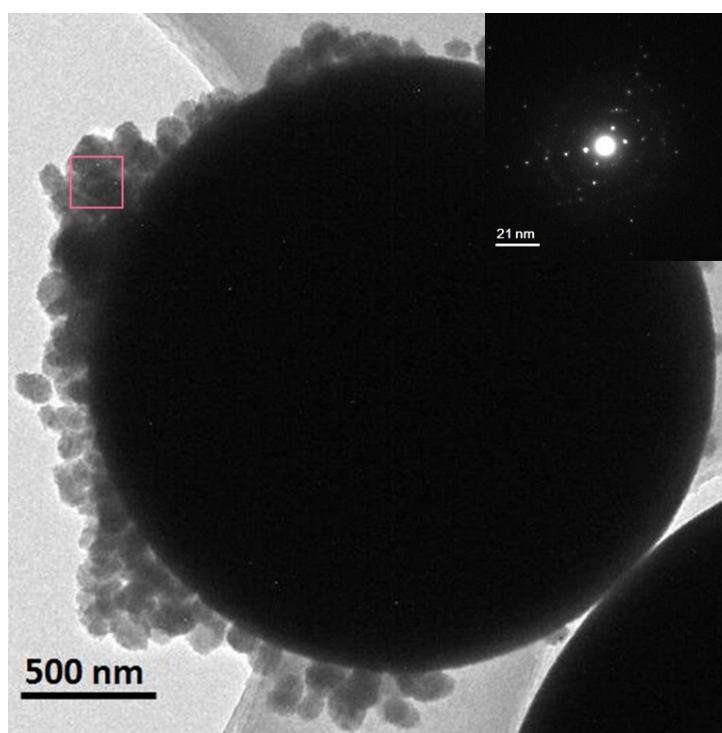

**Figure S2** HR-TEM image and SAED pattern (inset) of the sample synthesized for 4h
